# Supplementary material for: Searching for the Achilles’ Heel of Urethane Linkage—An Energetic Perspective
Source: MDPI journal article supplement (doi:10.3390/polym16081126), 2024-04-17
Supplement: s1 [file s1]

# Searching for the Achilles' Heel of Urethane Linkage—An Energetic Perspective

Tamás Horváth <sup>1,\*</sup>, Karina Kecskés <sup>1</sup>, Anikó Jordán Csábrádiné <sup>1</sup>, Emma Szőri-Dorogházi <sup>1</sup>, Béla Viskolcz <sup>2</sup> and Milán Szőri <sup>1,\*</sup>

<sup>1</sup> Institute of Chemistry, University of Miskolc, Miskolc-Egyetemváros A/2, H-3515 Miskolc, Hungary; kecskes.karina@student.uni-miskolc.hu (K.K.); aniko.jordan@uni-miskolc.hu (A.J.C.); emma.szori-doroghazi@uni-miskolc.hu (E.S.-D.)

<sup>2</sup> Higher Education and Industrial Cooperation Centre, University of Miskolc, H-3515 Miskolc, Hungary; bela.viskolcz@uni-miskolc.hu

\* Correspondence: tamas.horvath@uni-miskolc.hu (T.H.); milan.szori@uni-miskolc.hu (M.S.)

## Supplementary Information

**Table S1.** Reaction enthalpy values (in kJ/mol) for the termination of urethane linkage by different hydrogenation pathways in gas phase as well as in aniline and aqueous phases.

| reactant             | $\Delta_{R;298.15K}H^0$ (kJ/mol) |                            |                           | $\Delta_{R;398.15K}H$ (kJ/mol) |                            |                           |
|----------------------|----------------------------------|----------------------------|---------------------------|--------------------------------|----------------------------|---------------------------|
|                      | gasphase ( $\epsilon=1$ )        | aniline ( $\epsilon=6.8$ ) | water ( $\epsilon=78.4$ ) | gasphase ( $\epsilon=1$ )      | aniline ( $\epsilon=6.8$ ) | water ( $\epsilon=78.4$ ) |
| H <sub>2</sub> (TSa) | -0.4                             | -0.7                       | -5.3                      | -2.2                           | -2.5                       | -7.0                      |
| H <sub>2</sub> (TSb) | -51.5                            | -52.6                      | -60.1                     | -2.2                           | -54.4                      | -61.8                     |
| H <sub>2</sub> (TSc) | 20.0                             | 17.0                       | 13.3                      | 17.3                           | 14.3                       | 10.7                      |
| H <sub>2</sub> (Tsd) | -22.8                            | -35.0                      | -42.7                     | -1.4                           | -13.7                      | -21.5                     |

**Table S2.** Activation enthalpy values (in kJ/mol) for the termination of urethane linkage by different hydrogenation pathways in gas phase as well as in aniline and aqueous phases.

| reactant             | $\Delta_{TS;298.15K}H^0$ (kJ/mol) |                            |                           | $\Delta_{TS;398.15K}H$ (kJ/mol) |                            |                           |
|----------------------|-----------------------------------|----------------------------|---------------------------|---------------------------------|----------------------------|---------------------------|
|                      | gasphase ( $\epsilon=1$ )         | aniline ( $\epsilon=6.8$ ) | water ( $\epsilon=78.4$ ) | gasphase ( $\epsilon=1$ )       | aniline ( $\epsilon=6.8$ ) | water ( $\epsilon=78.4$ ) |
| H <sub>2</sub> (TSa) | 317.4                             | 291.2                      | 274.6                     | 314.8                           | 288.6                      | 272.0                     |
| H <sub>2</sub> (TSb) | 405.6                             | 359.3                      | 346.2                     | 403.3                           | 356.9                      | 343.7                     |
| H <sub>2</sub> (TSc) | 431.4                             | 357.8                      | 314.7                     | 429.5                           | 356.0                      | 312.9                     |
| H <sub>2</sub> (Tsd) | 296.2                             | 289.9                      | 281.5                     | 317.0                           | 310.9                      | 302.4                     |

**Table S3.** Zero-point corrected energy of the reaction ( $\Delta RE^0$  in kJ/mol) and zero-point corrected energy of the activation ( $\Delta TS E^0$  in kJ/mol) for the termination of urethane linkage by different hydrogenation pathways in gas phase as well as in aniline and aqueous phases.

| reactant             | $\Delta RE^0$ (kJ/mol)    |                            |                           | $\Delta TS E^0$ (kJ/mol)  |                            |                           |
|----------------------|---------------------------|----------------------------|---------------------------|---------------------------|----------------------------|---------------------------|
|                      | gasphase ( $\epsilon=1$ ) | aniline ( $\epsilon=6.8$ ) | water ( $\epsilon=78.4$ ) | gasphase ( $\epsilon=1$ ) | aniline ( $\epsilon=6.8$ ) | water ( $\epsilon=78.4$ ) |
| H <sub>2</sub> (TSa) | 2.9                       | 2.3                        | -2.7                      | 325.0                     | 298.8                      | 281.6                     |
| H <sub>2</sub> (TSb) | -48.7                     | -50.0                      | -57.7                     | 412.4                     | 366.4                      | 353.1                     |
| H <sub>2</sub> (TSc) | 26.7                      | 23.7                       | 19.6                      | 437.5                     | 363.0                      | 319.9                     |
| H <sub>2</sub> (Tsd) | 2.9                       | -9.4                       | -16.5                     | 326.0                     | 319.4                      | 310.9                     |

**Table S4.** Reaction enthalpy values (in kJ/mol) for the termination of urethane linkage by different reactants in gas phase as well as in aniline and aqueous phases.

| reactant                                             | $\Delta_{R;298.15K}H^0$ (kJ/mol) |                            |                           | $\Delta_{R;398.15K}H$ (kJ/mol) |                            |                           |
|------------------------------------------------------|----------------------------------|----------------------------|---------------------------|--------------------------------|----------------------------|---------------------------|
|                                                      | gasphase ( $\epsilon=1$ )        | aniline ( $\epsilon=6.8$ ) | water ( $\epsilon=78.4$ ) | gasphase ( $\epsilon=1$ )      | aniline ( $\epsilon=6.8$ ) | water ( $\epsilon=78.4$ ) |
| H <sub>2</sub> (TSa)                                 | -0.4                             | -0.7                       | -5.3                      | -2.2                           | -2.5                       | -7.0                      |
| H <sub>2</sub> O (TSe)                               | 2.1                              | 6.8                        | 7.7                       | 1.0                            | 5.6                        | 6.5                       |
| CH <sub>3</sub> OH (TSf)                             | 9.1                              | 13.1                       | 14.2                      | 9.2                            | 13.3                       | 14.3                      |
| H <sub>2</sub> O <sub>2</sub> (TSg)                  | -4.1                             | 7.2                        | 14.7                      | -3.8                           | -6.7                       | 14.1                      |
| C <sub>2</sub> H <sub>6</sub> O <sub>2</sub> (TSh)   | 22.0                             | 23.5                       | 22.8                      | 22.1                           | 23.6                       | 22.9                      |
| NH <sub>3</sub> (TSi)                                | 1.8                              | 1.7                        | -1.9                      | 1.4                            | 1.5                        | -2.1                      |
| CH <sub>3</sub> NH <sub>2</sub> (TSj)                | -4.4                             | -9.4                       | -15.5                     | -3.9                           | -8.9                       | -14.9                     |
| C <sub>2</sub> H <sub>7</sub> O <sub>3</sub> P (TSk) | 14.1                             | 17.0                       | 18.2                      | 14.3                           | 17.2                       | 18.3                      |

**Table S5.** Activation enthalpy values (in kJ/mol) for the termination of urethane linkage by different reactants in gas phase as well as in aniline and aqueous phases.

| reactant                                             | $\Delta_{TS;298.15K}H^0$ (kJ/mol) |                            |                           | $\Delta_{TS;398.15K}H$ (kJ/mol) |                            |                           |
|------------------------------------------------------|-----------------------------------|----------------------------|---------------------------|---------------------------------|----------------------------|---------------------------|
|                                                      | gasphase ( $\epsilon=1$ )         | aniline ( $\epsilon=6.8$ ) | water ( $\epsilon=78.4$ ) | gasphase ( $\epsilon=1$ )       | aniline ( $\epsilon=6.8$ ) | water ( $\epsilon=78.4$ ) |
| H <sub>2</sub> (TSa)                                 | 317.4                             | 291.2                      | 274.6                     | 314.8                           | 288.6                      | 272.0                     |
| H <sub>2</sub> O (TSe)                               | 224.9                             | 207.8                      | 194.0                     | 223.7                           | 206.5                      | 192.7                     |
| CH <sub>3</sub> OH (TSf)                             | 206.8                             | 190.6                      | 179.4                     | 206.0                           | 189.7                      | 178.4                     |
| H <sub>2</sub> O <sub>2</sub> (TSg)                  | 174.8                             | 160.5                      | 150.2                     | 174.3                           | 152.8                      | 149.0                     |
| C <sub>2</sub> H <sub>6</sub> O <sub>2</sub> (TSh)   | 202.9                             | 189.4                      | 180.1                     | 201.6                           | 188.0                      | 178.7                     |
| NH <sub>3</sub> (TSi)                                | 237.3                             | 212.9                      | 202.4                     | 236.3                           | 211.7                      | 201.2                     |
| CH <sub>3</sub> NH <sub>2</sub> (TSj)                | 218.6                             | 192.0                      | 182.1                     | 218.1                           | 191.3                      | 181.4                     |
| C <sub>2</sub> H <sub>7</sub> O <sub>3</sub> P (TSk) | 302.4                             | 287.2                      | 267.1                     | 302.2                           | 287.1                      | 267.1                     |

**Table S6.** Zero-point corrected energy of the reaction ( $\Delta_{\text{RE}}^0$  in kJ/mol) and zero-point corrected energy of the activation ( $\Delta_{\text{TS}}^0$  in kJ/mol) for the termination of urethane linkage by different reactants in gas phase as well as in aniline and aqueous phases.

| reactant                                             | $\Delta_{\text{RE}}^0$ (kJ/mol) |                            |                           | $\Delta_{\text{TS}}^0$ (kJ/mol) |                            |                           |
|------------------------------------------------------|---------------------------------|----------------------------|---------------------------|---------------------------------|----------------------------|---------------------------|
|                                                      | gasphase ( $\epsilon=1$ )       | aniline ( $\epsilon=6.8$ ) | water ( $\epsilon=78.4$ ) | gasphase ( $\epsilon=1$ )       | aniline ( $\epsilon=6.8$ ) | water ( $\epsilon=78.4$ ) |
| H <sub>2</sub> (TSa)                                 | 2.9                             | 2.3                        | -2.7                      | 325.0                           | 298.8                      | 281.6                     |
| H <sub>2</sub> O (TSe)                               | 4.3                             | 9.4                        | 10.2                      | 229.3                           | 212.7                      | 198.5                     |
| CH <sub>3</sub> OH (TSf)                             | 9.0                             | 13.4                       | 14.3                      | 210.4                           | 194.6                      | 183.1                     |
| H <sub>2</sub> O <sub>2</sub> (TSg)                  | -5.1                            | 8.6                        | 16.6                      | 177.3                           | 164.0                      | 154.4                     |
| C <sub>2</sub> H <sub>6</sub> O <sub>2</sub> (TSh)   | 22.4                            | 24.2                       | 22.7                      | 208.1                           | 194.2                      | 184.6                     |
| NH <sub>3</sub> (TSi)                                | 3.7                             | 3.2                        | 0.1                       | 242.1                           | 217.7                      | 207.5                     |
| CH <sub>3</sub> NH <sub>2</sub> (TSj)                | -5.2                            | -10.2                      | -16.7                     | 221.9                           | 195.7                      | 185.7                     |
| C <sub>2</sub> H <sub>7</sub> O <sub>3</sub> P (TSk) | 14.5                            | 16.8                       | 18.8                      | 305.5                           | 288.3                      | 269.1                     |

**Table S7.** Reaction enthalpy values (in kJ/mol) for the termination of urethane linkage by different ionization methods in gas phase as well as in aniline and aqueous phases.

| reactant            | $\Delta_{\text{R:298.15K}}^0$ (kJ/mol) |                            |                           | $\Delta_{\text{R:398.15K}}^0$ (kJ/mol) |                            |                           |
|---------------------|----------------------------------------|----------------------------|---------------------------|----------------------------------------|----------------------------|---------------------------|
|                     | gasphase ( $\epsilon=1$ )              | aniline ( $\epsilon=6.8$ ) | water ( $\epsilon=78.4$ ) | gasphase ( $\epsilon=1$ )              | aniline ( $\epsilon=6.8$ ) | water ( $\epsilon=78.4$ ) |
| MPCate <sup>-</sup> | 101.0                                  | -68.8                      | -116.3                    | 102.0                                  | -68.1                      | -72.5                     |
| MPCate <sup>+</sup> | 791.0                                  | 617.4                      | 594.5                     | 791.2                                  | 617.4                      | 594.5                     |
| H <sup>+</sup> (1)  | -833.4                                 | -541.0                     | -496.1                    | -826.7                                 | -1027.0                    | -497.9                    |
| H <sup>+</sup> (2)  | -951.0                                 | -476.2                     | -391.0                    | -843.0                                 | -1030.5                    | -505.2                    |
| OH <sup>-</sup> (1) | 97.2                                   | 75.5                       | 55.6                      | 96.6                                   | 74.8                       | 55.1                      |
| OH <sup>-</sup> (2) | 13.4                                   | 13.1                       | 6.9                       | 13.4                                   | 13.1                       | 7.1                       |

**Table S8.** Zero-point corrected energy of the reaction ( $\Delta_{\text{RE}}^0$  in kJ/mol) for the termination of urethane linkage by electron capture/detachment in gas phase as well as in aniline and aqueous phases.

| reactant            | $\Delta_{\text{RE}}^0$ (kJ/mol) |                            |                           |
|---------------------|---------------------------------|----------------------------|---------------------------|
|                     | gasphase ( $\epsilon=1$ )       | aniline ( $\epsilon=6.8$ ) | water ( $\epsilon=78.4$ ) |
| MPCate <sup>-</sup> | 99.2                            | -69.7                      | -113.6                    |
| MPCate <sup>+</sup> | 790.8                           | 617.5                      | 594.6                     |
| H <sup>+</sup> (1)  | -828.3                          | -535.5                     | -490.5                    |
| H <sup>+</sup> (2)  | -944.4                          | -469.5                     | -384.2                    |

**Table S9.** Activation enthalpy values (in kJ/mol) for the termination of urethane linkage by different hydroxylation methods in gas phase as well as in aniline and aqueous phases.

| reactant       | $\Delta_{TS,298.15K}H^0$ (kJ/mol) |                            |                           | $\Delta_{TS,398.15K}H^0$ (kJ/mol) |                            |                           |
|----------------|-----------------------------------|----------------------------|---------------------------|-----------------------------------|----------------------------|---------------------------|
|                | gasphase ( $\epsilon=1$ )         | aniline ( $\epsilon=6.8$ ) | water ( $\epsilon=78.4$ ) | gasphase ( $\epsilon=1$ )         | aniline ( $\epsilon=6.8$ ) | water ( $\epsilon=78.4$ ) |
| OH $\cdot$ (1) | 130.3                             | 128.4                      | 129.9                     | 129.1                             | 127.2                      | 128.9                     |
| OH $\cdot$ (2) | 164.4                             | 134.1                      | 105.2                     | 163.5                             | 133.2                      | 104.5                     |

**Table S10.** Zero-point corrected energy of the reaction ( $\Delta_R E^0$  in kJ/mol) and zero-point corrected energy of the activation ( $\Delta_{TS} E^0$  in kJ/mol) for the termination of urethane linkage by different hydroxylation methods in gas phase as well as in aniline and aqueous phases.

| reactant       | $\Delta_R E^0$ (kJ/mol)   |                            |                           | $\Delta_{TS} E^0$ (kJ/mol) |                            |                           |
|----------------|---------------------------|----------------------------|---------------------------|----------------------------|----------------------------|---------------------------|
|                | gasphase ( $\epsilon=1$ ) | aniline ( $\epsilon=6.8$ ) | water ( $\epsilon=78.4$ ) | gasphase ( $\epsilon=1$ )  | aniline ( $\epsilon=6.8$ ) | water ( $\epsilon=78.4$ ) |
| OH $\cdot$ (1) | 100.8                     | 79.3                       | 59.1                      | 134.4                      | 133.2                      | 133.7                     |
| OH $\cdot$ (2) | 14.2                      | 14                         | 7                         | 168.2                      | 138.1                      | 108.1                     |
